# Supplementary material
Source: publisher figshare collection journal article supplement (https://acs.figshare.com/ndownloader/files/4754416)
Supplement: Supplementary file 1 [file 4754416]

Supporting Information for

Interaction of the neurotransmitter, neuropeptide Y  
(NPY), with phospholipid membranes:

Film balance and fluorescence microscopy studies

*Martina Dyck<sup>1</sup> and Mathias Lösche<sup>2,3,\*</sup>*

University of Leipzig, Institute of Experimental Physics I, D-04103 Leipzig, Germany,  
Carnegie Mellon University, Department of Physics, Pittsburgh, PA 15213-3890, USA, and  
CNBT Consortium, NIST Center for Neutron Research, Gaithersburg, MD 20899-8562, USA

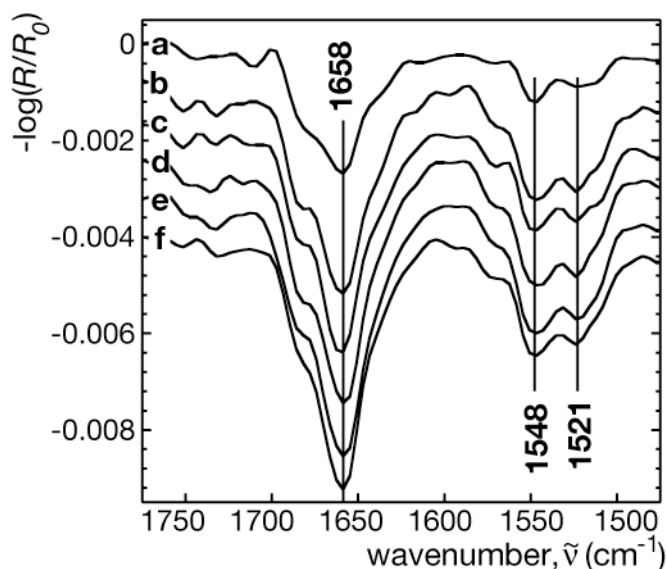

**Figure S1:** Amide region of external Fourier-transform infrared reflection-absorption spectra (FT-IRRA; p-polarization, incident angle,  $\alpha_i = 40^\circ$ ,  $T = 20^\circ\text{C}$ ) of a hNPY film on a water subphase at various states of compression (a:  $\pi = 0$  mN/m, b: 8 mN/m, c: 12 mN/m and d: 16 mN/m). The FT-IRRA spectra show a strong, narrow absorption band at  $1658\text{ cm}^{-1}$ , the amide I mode, which is mainly associated with the C=O stretching mode of the peptide backbone. The position of this band is conformationally sensitive<sup>1</sup> and indicates that hNPY adopts an  $\alpha$ -helical secondary structure at the air/water interface. In addition, the amide II band at  $1548\text{ cm}^{-1}$  also indicates an  $\alpha$ -helical structure. The amide I band shows a high-frequency shoulder ( $\sim 1685\text{ cm}^{-1}$ ) that may arise from a turn or a loop in the peptide.<sup>1</sup> Since hNPY has 5 tyrosine residues, the band in the amide II region at  $\sim 1520\text{ cm}^{-1}$  can be attributed to C–H in-plane bending and C–C stretching vibrations of tyrosine.<sup>2</sup> Since there is no amide I absorption detected near  $1630\text{ cm}^{-1}$ , it is rather unlikely that the band at  $1520\text{ cm}^{-1}$  should be attributed to a  $\beta$ -sheet conformation.

The data have been collected in collaboration with Andreas Kerth and Alfred Blume at the Institute of Physical Chemistry at the Martin Luther University in Halle, Germany. A full account of this work will be presented elsewhere.<sup>3</sup>

## REFERENCES

- (1) Goormaghtigh, E.; Cabiaux, V.; Ruyschaert, J.-M. Determination of Soluble and Membrane Protein Structure by Fourier Transform Infrared Spectroscopy. In *Physico-chemical Methods in the Study of Biomembranes*; Hilderson, H. J., Ralston, G. B., Eds.; Plenum Press, 1994; pp 405.
- (2) Barth, A. *Progress in Biophysics and Molecular Biology* **2000**, 74, 141.
- (3) Dyck, M.; Kerth, A.; Blume, A.; Lösche, M. *J. Phys. Chem. B* **2006**, submitted.
